# Supplementary material for: Saturation-scale functional evidence supports clinical variant interpretation in Lynch syndrome
Source: Springer Nature journal article supplement (doi:10.1186/s13059-022-02839-z), 2022-12-22
Supplement: MOESM2 [file 13059_2022_2839_MOESM2_ESM.pdf]

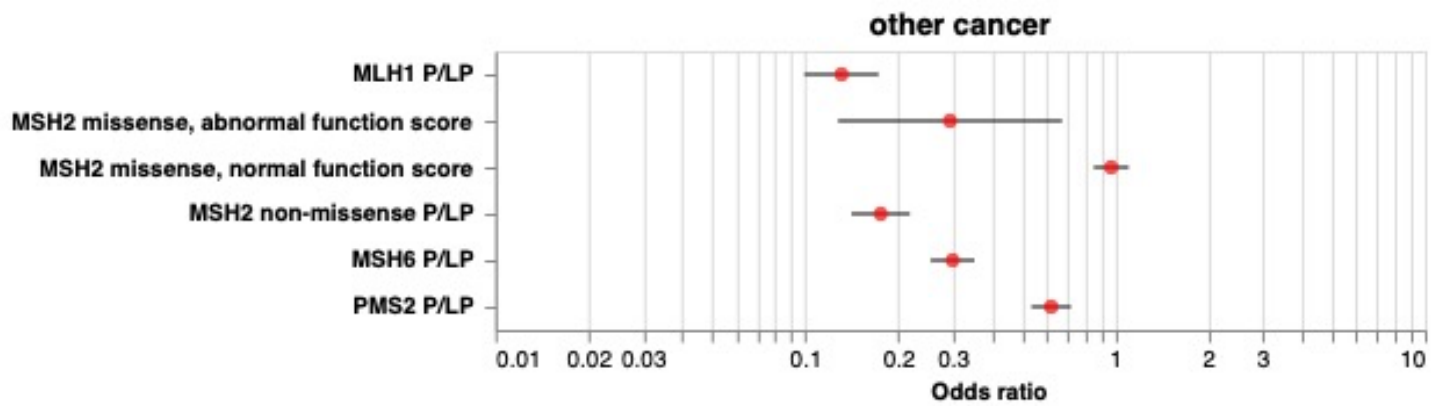

**Figure S1. Associations with other cancers, by variant type.** Shown as associations (odds ratio from logistic regression) between different categories of LS gene variants and cancer diagnosis, specifically excluding colorectal, uterine, and endometrial cancers.
